# Supplementary material
Source: Elsevier journal article supplement (https://rcastoragev2.blob.core.windows.net/e4cbd957ad7437f0c19fe608b9e6abe8/mmc1.pdf)
Supplement: mmc1 [file mmc1.pdf]

**Molecular Cell, Volume 78**

## **Supplemental Information**

### **Cryo-EM Structure of the Fork Protection Complex**

#### **Bound to CMG at a Replication Fork**

**Domagoj Baretic, Michael Jenkyn-Bedford, Valentina Aria, Giuseppe Cannone, Mark Skehel, and Joseph T.P. Yeeles**

**Figure S1**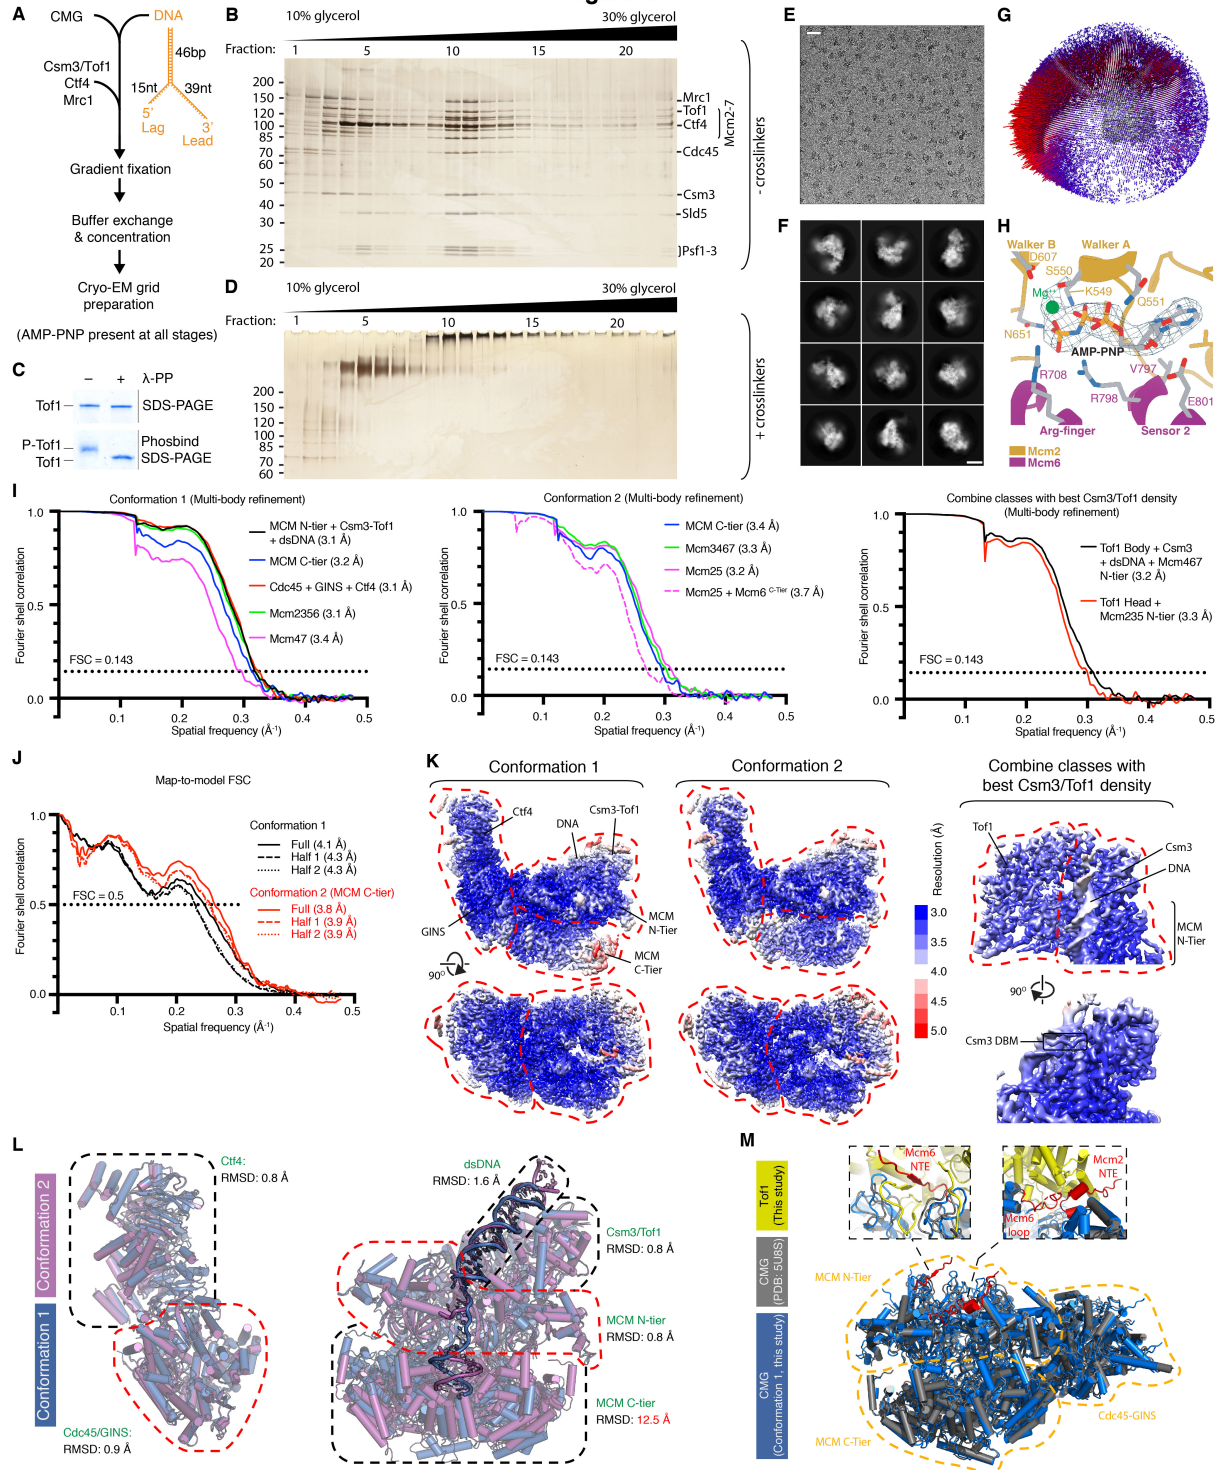

**Figure S1, related to Figure 1. Samples for cryo-EM experiments prepared by *in vitro* reconstitution.**

- (A) Schematic illustrating method of sample preparation for cryo-EM experiments.
- (B) Representative silver-stained SDS-PAGE showing fractions taken across glycerol gradient prepared with omission of cross-linking agents.
- (C) Analysis of Tof1 phosphorylation status. Tof1 was analyzed by Coomassie-stained SDS-PAGE in the absence and presence of Phosbind as indicated.
- (D) As in (B) but for a gradient containing the cross-linking agents bis(sulfosuccinimidyl) suberate (BS<sup>3</sup>) and glutaraldehyde. Fractions 10+11 were pooled for cryo-EM grid preparation.
- (E) Representative cryo-EM micrograph. Scale bar, 30 nm.
- (F) Representative 2D class averages. Scale bar, 10 nm.
- (G) Representative 3D angular distribution of particle projections.
- (H) Representative example of cryo-EM density observed for bound AMP-PNP•Mg<sup>2+</sup>.
- (I) Representative Fourier shell correlation (FSC) curves shown for maps used in model building. The FSC=0.143 criterion used to determine map resolution is indicated on all graphs (dotted black line). Left: conformation 1 (grey maps in Figure S2). Centre: conformation 2 (yellow maps in Figure S2). The Mcm25+Mcm6<sup>C-tier</sup> curve (dashed line) is derived from multi-body refinement of a separate 3D subclassification (refer to Figure S2). Right: maps used to build Csm3/Tof1 models (red maps in Figure S2).
- (J) Model-to-map FSC curves. *Full*: correlation between the sum of half-map 1 and half-map 2, and the refined model. *Half 1*: correlation between half-map 1 and the model refined in half-map 1. *Half 2*: correlation between half-map 2 and the model refined in half-map 1.
- (K) Representative cryo-EM density maps colored by local resolution. In each case, composite maps are displayed comprising separate maps derived from multi-body refinement, indicated by the red-dashed lines. Far-right: multi-body refinement maps used for Csm3/Tof1 model building derived from combining particles in conformations 1 and 2 (coloured red in Figure S2).
- (L) Comparison of conformations 1 and 2. Models were built for the entire complex in conformation 1, and the MCM C-tier of conformation 2. To complete the model of conformation 2, remaining subunits were docked as rigid bodies with models fitting the density well. Complete models for conformations 1 and 2 were then aligned on either the MCM N-tier or Cdc45/GINS (red outlines) and root mean square deviation (RMSD) values calculated for the regions indicated (dashed outlines) without further alignment. The large movement in the C-tier resulting in the high RMSD value is illustrated in Movie S1.
- (M) Accessory-factor binding does not induce large conformational changes in CMG helicase. CMG from conformation 1 (CMG-Csm3/Tof1-Mrc1-Ctf4-DNA) was compared to the published model of CMG-DNA (PDB: 5U8S) (Georgescu et al., 2017) by aligning on the MCM N-tier using PyMOL. Regions of Mcm2 and Mcm6 which became ordered by direct interaction with Tof1 are highlighted in red.

**Figure S2**

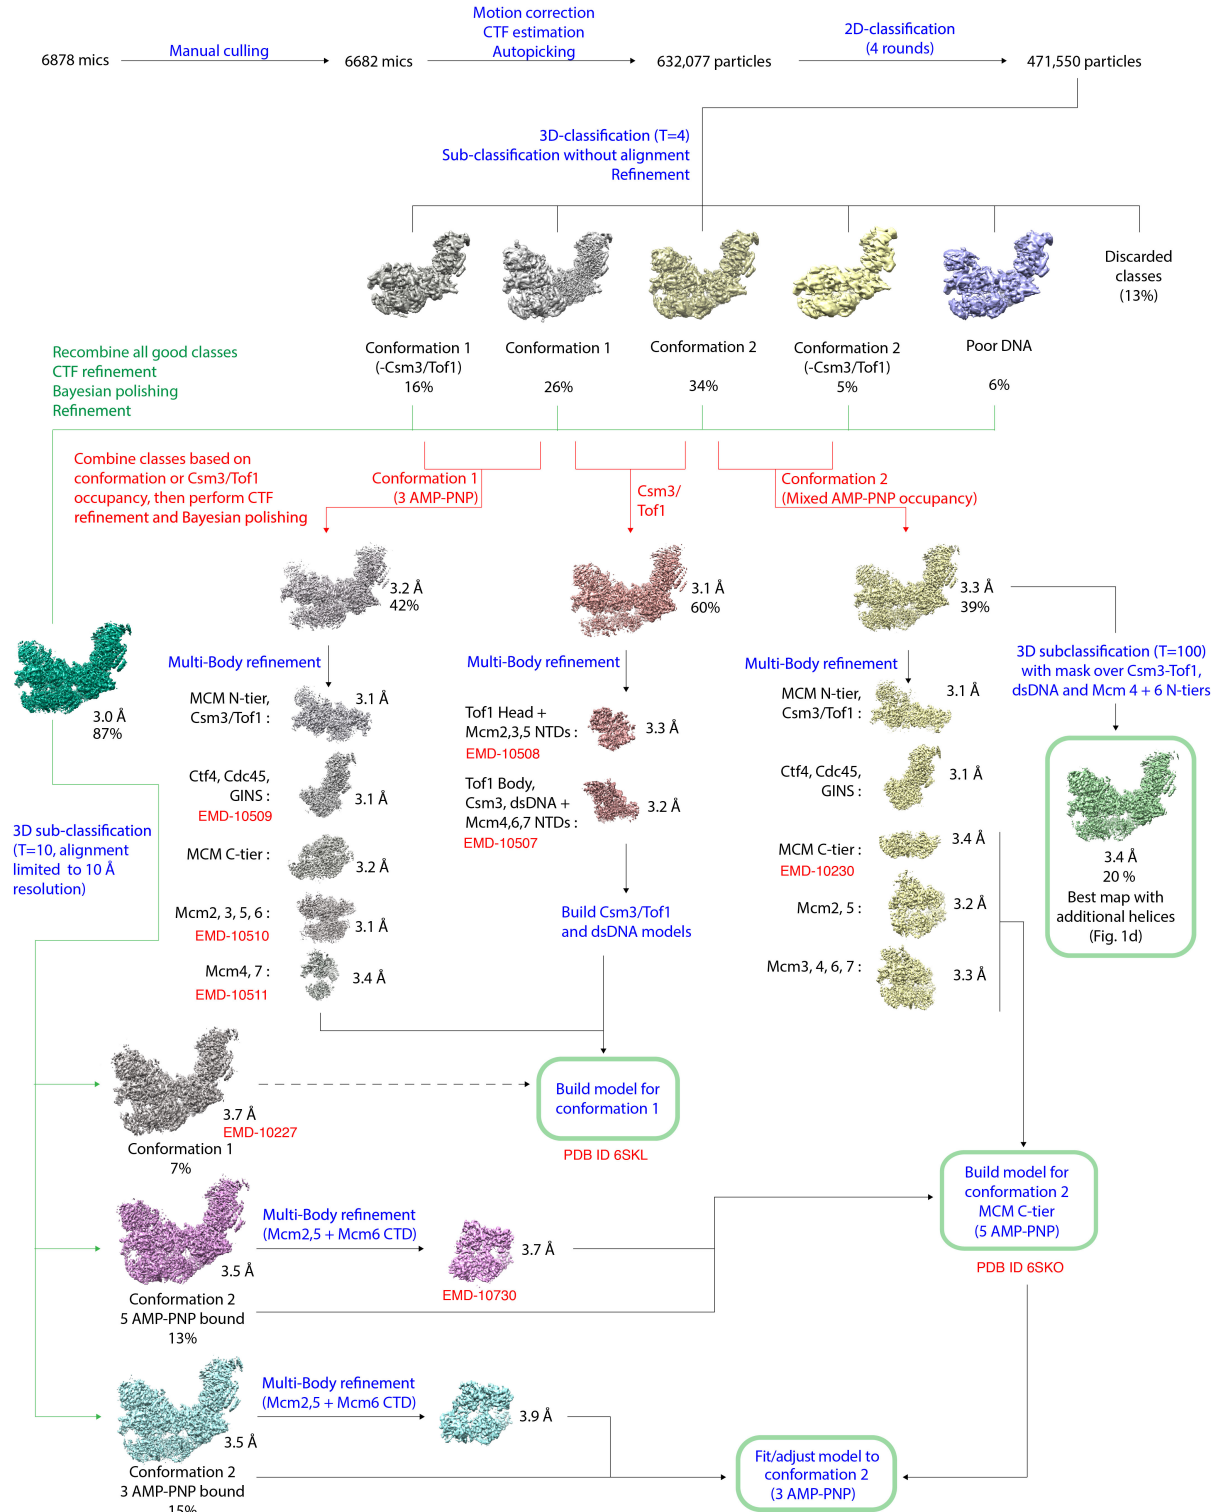

**Figure S2, related to Figure 1. Schematic of data processing pipeline for cryo-EM samples prepared by *in vitro* reconstitution.**

Cryo-EM density maps related to conformation 1 are colored grey. The 3.7 Å conformation 1 map represents the map with best density over all subunits in a single map for this conformation. Maps related to conformation 2 are colored yellow for maps with a mixed AMP-PNP occupancy, or magenta/cyan for maps with five/three AMP-PNP bound. T is the regularization parameter used during 3D classification. Green boxes highlight the final models discussed in the text and the map best illustrating regions of unassigned density (Figure S3J).



**Figure S3**

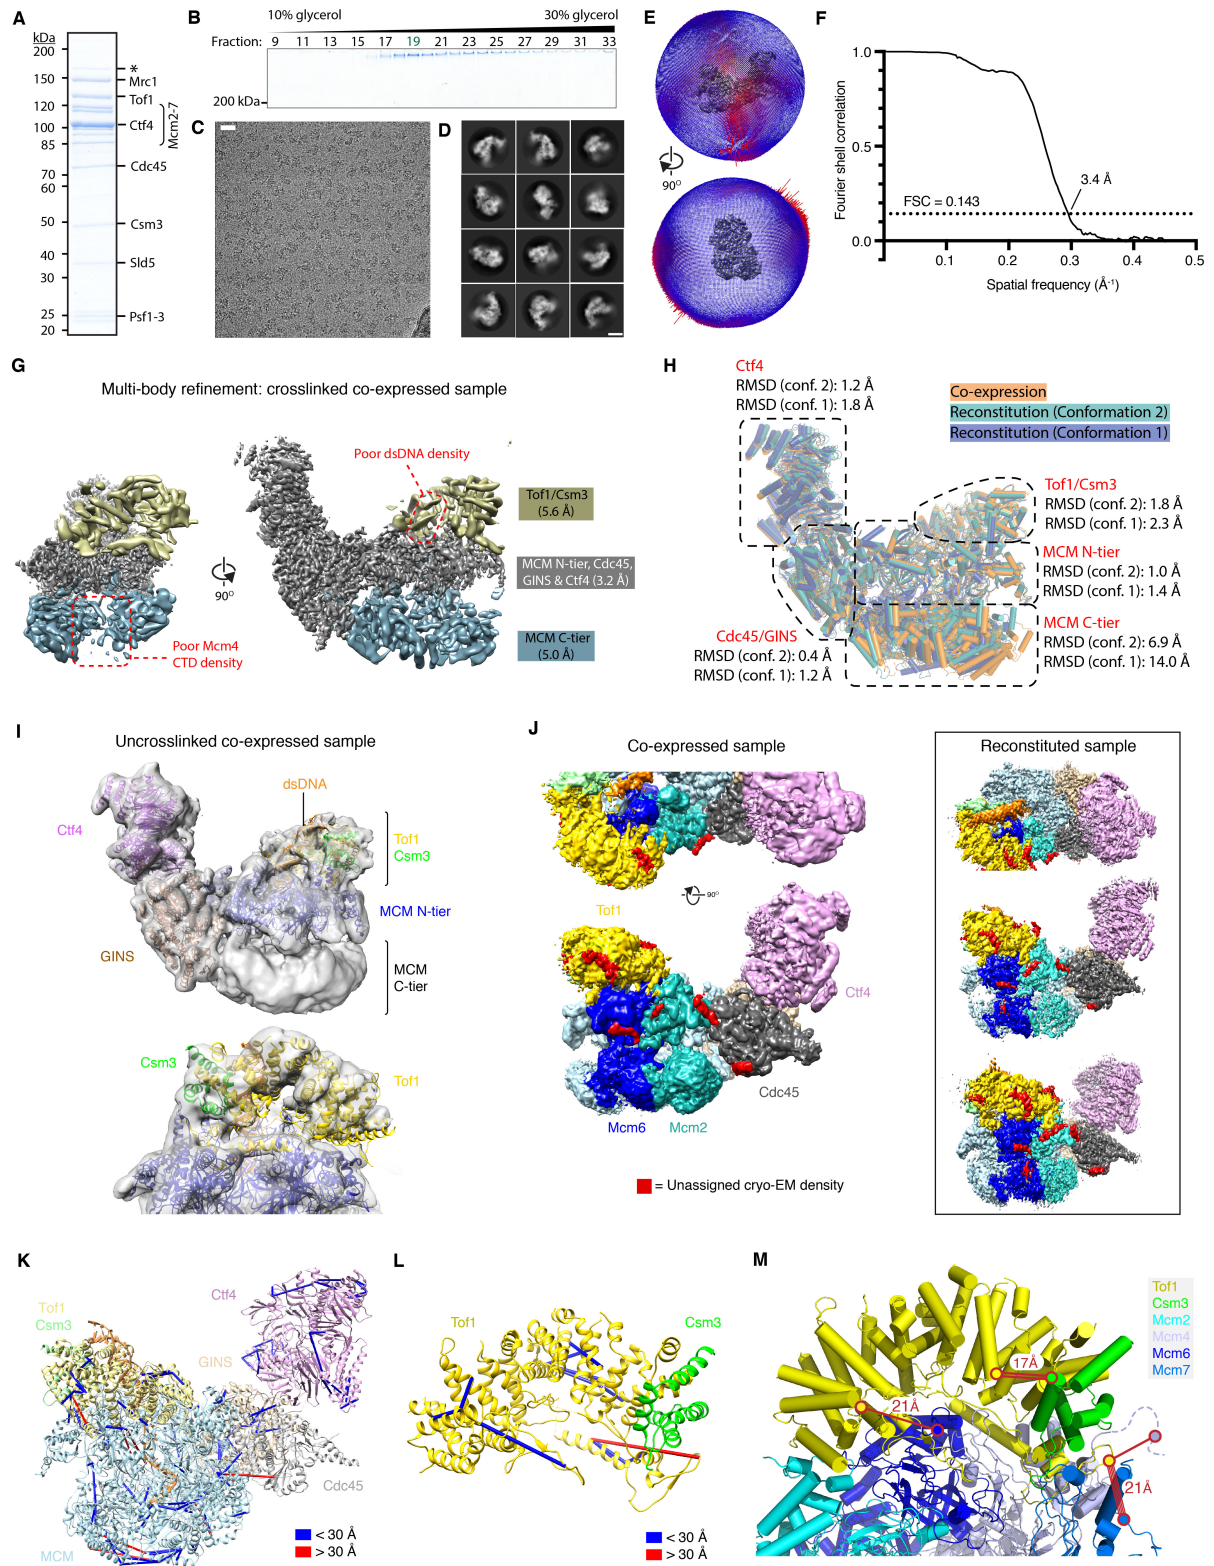

**Figure S3, related to Figure 1. Samples for cryo-EM experiments prepared by co-expression of 15 proteins in *S. cerevisiae*.**

(A, B) Representative Coomassie-stained SDS-PAGE of the eluate from calmodulin sepharose 4B resin (A) (see Methods for details) and fractions across a crosslinking glycerol gradient containing glutaraldehyde (B). In (B), fraction 19 was taken for cryo-EM grid preparation. The 14 mL gradient (400  $\mu$ L fractions) used in (B) differs from the 2.2 mL gradient (100  $\mu$ L fractions) used for the reconstituted sample (Figure S1B and S1D), explaining the discrepancy in the fraction number chosen. \* indicates a contaminant with comparable migration to previously identified Pol1, a known interaction partner of Ctf4 shown to co-purify with replisome progression complexes under similar purification conditions (Gambus et al., 2006). All panels in Figure S3A-J (except Figure S3I) depict samples prepared with crosslinking.

(C) Representative cryo-EM micrograph. Scale bar, 30 nm.

(D) Representative 2D class averages. Scale bar, 10 nm.

(E) 3D angular distribution for particle projections.

(F) Fourier shell correlation curve for the best overall cryo-EM map.

(G) Cryo-EM maps produced using multi-body refinement, with individually refined regions (bodies) colored separately. Single-stranded DNA was not observed to bind the MCM C-tier, consistent with a mixed population of conformations 1 and 2 which were distinguished only after stabilizing the C-tier by addition of AMP-PNP to the reconstituted sample.

(H) Comparison of reconstitution and co-expression datasets illustrating that major differences are only observed in the MCM C-tier. The model for the co-expressed sample was generated by rigid body fitting of individual subunits from the reconstituted sample into the co-expression map, with N- and C-tier regions fitted independently for each Mcm. The complete model for conformation 2 was produced as described for Figure S1L. Complete models (except DNA) were aligned on the region encompassing MCM N-tier, Cdc45 and GINS, and RMSD values were determined for each region of the complex indicated by dashed outlines without further alignment.

(I) Cryo-EM density map for a sample produced by co-expression without addition of cross-linking agents. The model for conformation 1 (built using the high-resolution reconstituted dataset, see Figures 1, S1 and S2) with the C-tier deleted fitted the density well as a single rigid body indicating crosslinking did not affect the gross architecture of the complex.

(J) Cryo-EM density maps for the co-expressed and reconstituted samples coloured by subunit indicating the position of regions of unassigned density (red).

(K) Inter- and intra-subunit cross-links (score  $\geq 60$ ) detected by cross-linking mass spectrometry (XL-MS) mapped to the model of conformation 1. The distance expected between C $\alpha$  atoms of the cross-linked residues was expected to be  $\sim 30$  Å or less. The majority of crosslinking distances exceeding 30 Å can be rationalized by flexibility in the complex, primarily in the mobile MCM C-tier known to adopt multiple conformations, the flexibly tethered Mcm4 winged-helix domain observed to reposition in conformation 2, and loops which might reposition in a subset of particles.

(L) Intra-subunit cross-links detected by XL-MS for Csm3/Tof1 (score  $\geq 60$ ). Note the cross-linking distance  $> 30$  Å was detected for a cross-link between two residues in the MCM-plugin which would become disordered if a sub-population of particles had dissociated from CMG during sample preparation or analysis.

(M) Inter-subunit cross-links detected by XL-MS for Csm3/Tof1 (score  $\geq 60$ ). The number of lines denotes the number of crosslinks detected. Circles denote the position of the residues observed to cross-link, coloured by subunit.

**Figure S4**

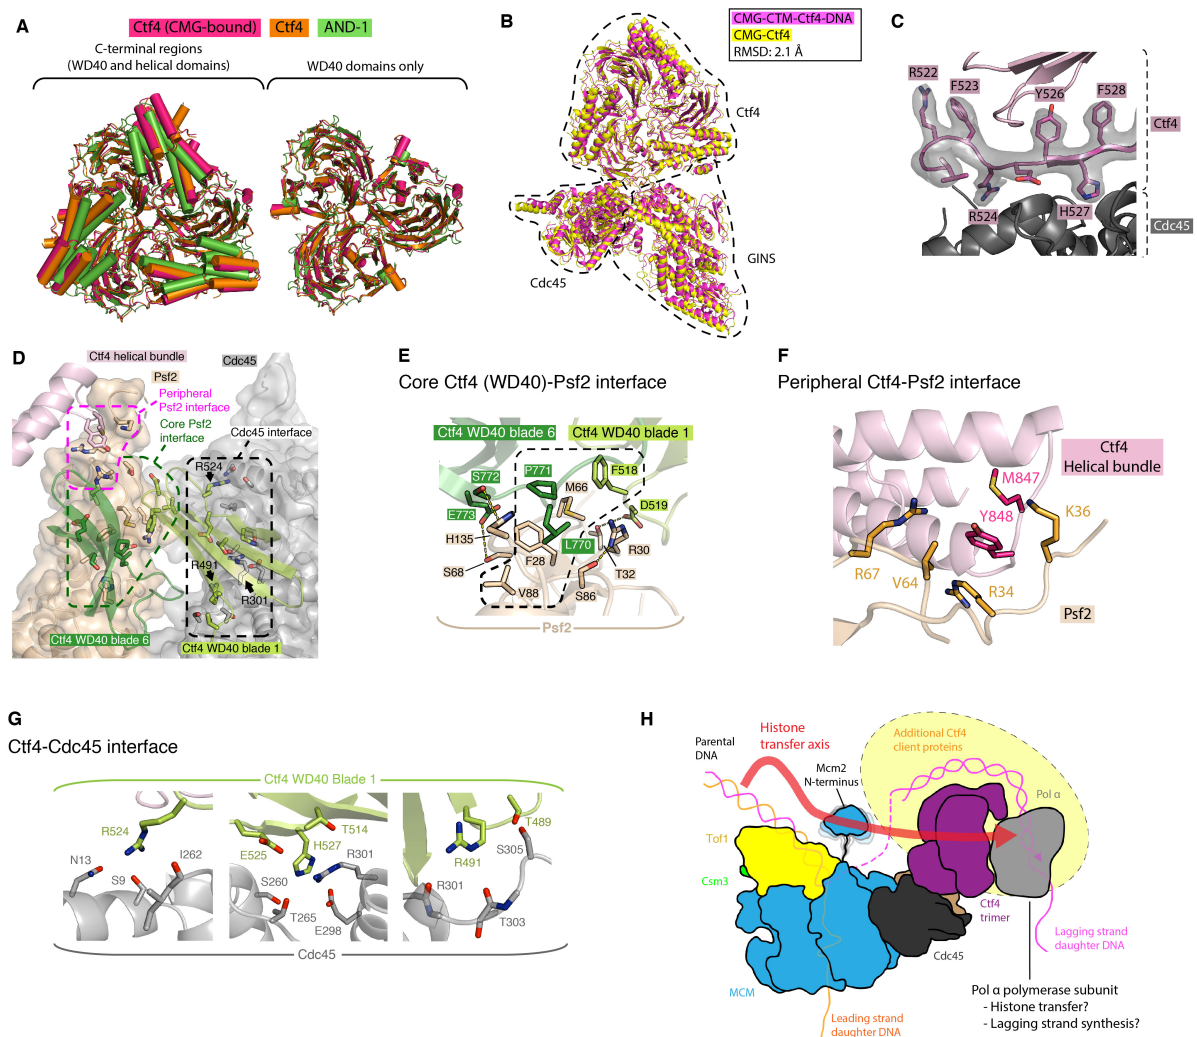

**Figure S4, related to Figure 1. Ctf4 tethering in the replisome.**

(A) Comparison of CMG-bound Ctf4 with previously published crystal structures of the C-terminal regions of trimeric Ctf4 (PDB: 4C8H) (Simon et al., 2014) and human And-1 (PDB: 5OGS) (Kilkenny et al., 2017).

(B) Comparison of the Cdc45-GINS-Ctf4 region of the CMG-Csm3/Tof1-Mrc1-Ctf4-DNA structure (conformation 1) with a prior structure of Ctf4 bound to a single CMG molecule in the absence of DNA (PDB: 6PTJ) (Yuan et al., 2019).

(C) Representative region of cryo-EM density at the CMG:Ctf4 interface, shown for a region of Ctf4 WD40 blade 1.

(D) Overview of the CMG-Ctf4 interface from a “top-down” perspective looking from Ctf4 towards Cdc45/GINS. Surface representations are shown for Cdc45/GINS. Only the regions of Ctf4 involved in the interaction are displayed. Core and peripheral interaction networks at the interface with Psf2 are expanded in (E) and (F), respectively. Arginine residues central to interaction networks at the interface with Cdc45 [expanded in (G)] are labelled.

(E) Ctf4-Psf2 core interface mediated by the Ctf4 WD40 domain. The central hydrophobic network is indicated by the dashed outline. Yellow dashes indicate hydrogen bonds.

(F) Ctf4-Psf2 peripheral interaction network mediated by the Ctf4 helical bundle.

(G) Ctf4-Cdc45 interface, subdivided into three interaction networks each involving a central arginine.

(H) Schematic illustrating the position of Ctf4 in the context of the eukaryotic replisome replicating DNA. The position of Pol  $\alpha$  suggested by recent cryo-EM investigation of CMG-Ctf4 complexes in the absence of DNA is indicated (Yuan et al., 2019). The N-terminus of Mcm2 (not resolved) is also illustrated as flexibly tethered. The yellow halo indicates additional Ctf4 interacting partners (“clients”) are expected to interact with the replisome, including Chl1, Dia2 and Dna2 (Morohashi et al., 2009; Villa et al., 2016). The role suggested of Ctf4 in parental histone transfer to the lagging strand along the Mcm2-Ctf4-Pol  $\alpha$  axis is illustrated (Gan et al., 2018).



**Figure S5**

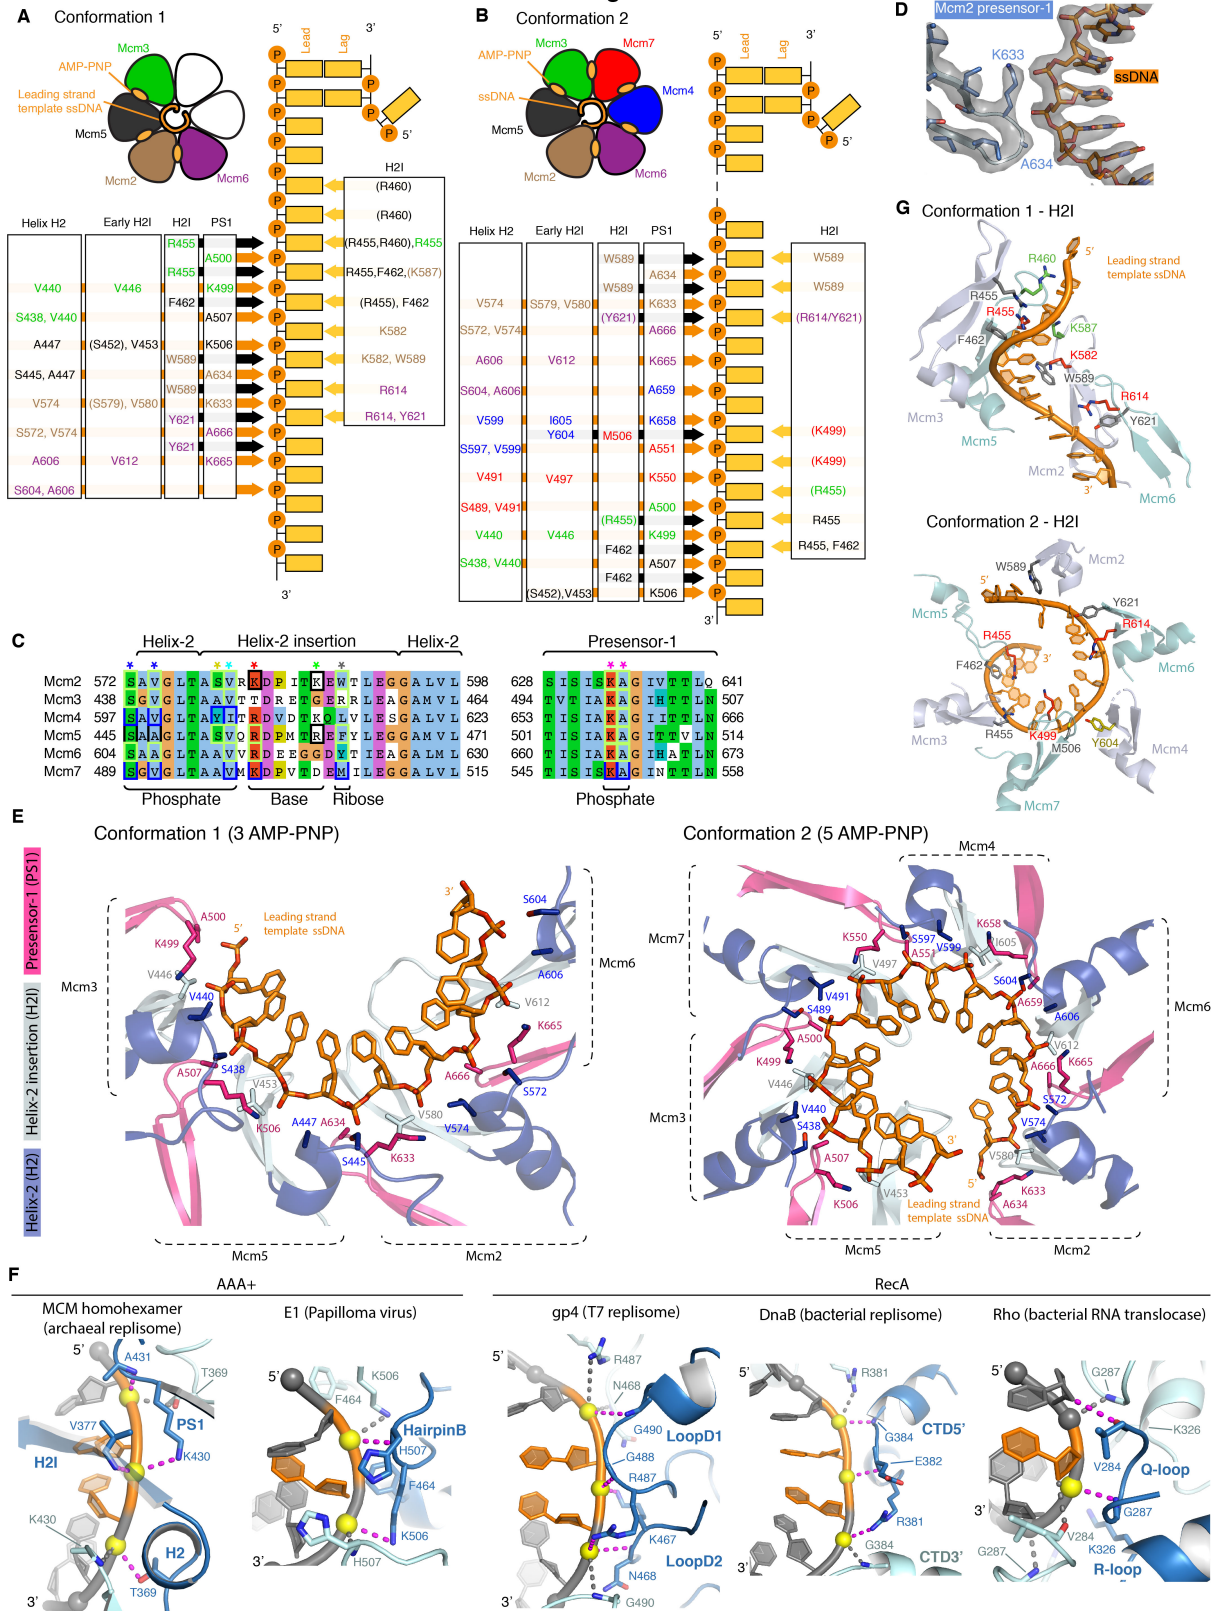

**Figure S5, related to Figure 3.**

(A, B) Representation of contacts made by the MCM C-tier with leading-strand template ssDNA for conformations 1 and 2 respectively based on proximity. Arrows indicating interaction with phosphate (“P”), ribose and nucleobase moieties are colored orange, black and yellow, respectively. Parentheses denote residues where cryo-EM density could not unambiguously identify the position of side chains.

(C) Multiple sequence alignment for MCM C-tier DNA binding loops for *S. cerevisiae* MCM subunits. Boxes indicate residues involved in ssDNA interactions, with interactions observed in conformation 1, 2 or both colored black, blue or lime-green, respectively. Asterisks above the alignment are colored according to the scheme used in other panels.

(D) Cryo-EM density observed for C-tier-bound ssDNA and a representative interacting loop.

(E) Repetitive interactions of MCM C-tier AAA<sup>+</sup> domains with the leading-strand template phosphate moieties.

(F) Comparison of repetitive phosphate contacts mediated by diverse homohexameric nucleic acid helicases (PDB: archaeal MCM, 6MII; E1, 2GXA; T7, 6N7N; DnaB, 4ESV; Rho, 5JJI) (Enemark and Joshua-Tor, 2006; Gao et al., 2019; Itsathitphaisarn et al., 2012; Meagher et al., 2019; Thomsen et al., 2016).

(G) Interactions of MCM H2I loop residues with sugar/base moieties of leading-strand template ssDNA. Residues are colored according to their position in the H2I primary sequence, corresponding to the panel (C) asterisks. Additional arginine residues in Mcm2/5 in conformation 1 (coloured green), and a tyrosine residue from Mcm4 in conformation 2 (colored yellow), at distinct positions in the H2I loop are also shown to contact ssDNA.



**Figure S6**

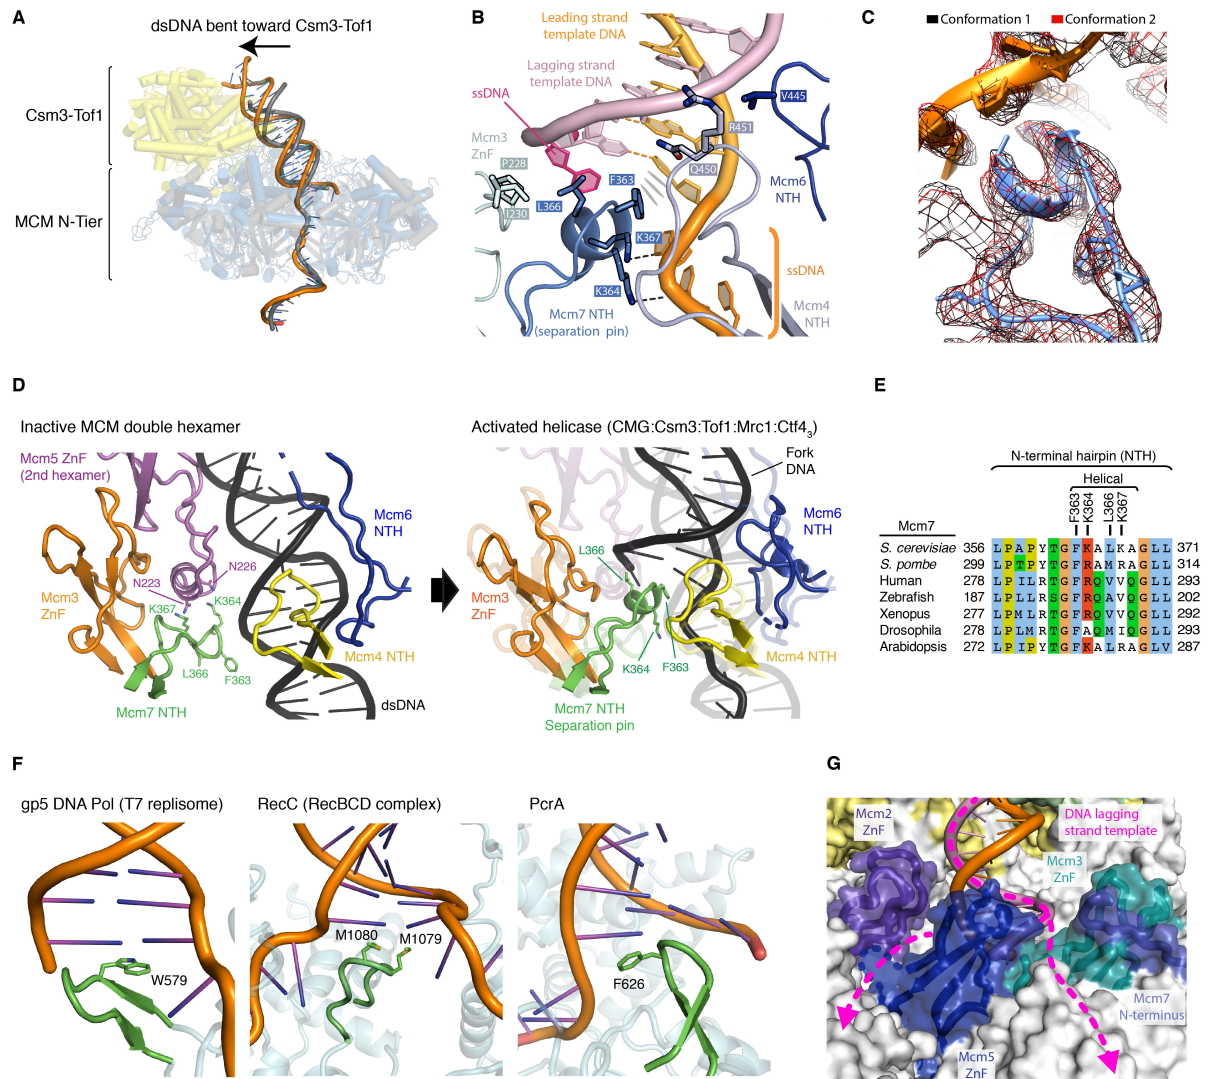

**Figure S6, related to Figure 3.**

(A) Superposition of the CMG-Ctf4-Csm3/Tof1-Mrc1-fork DNA structure (conformation 1, coloured blue [MCM], yellow [Csm3/Tof1], orange [DNA]) with a prior CMG-fork DNA structure (PDB: 5U8S, coloured grey) (Georgescu et al., 2017). For clarity only the MCM N-tier, Csm3/Tof1 and DNA are shown. Models were aligned on the MCM N-Tier using PyMOL. (B) Detailed view of the residues involved in interactions with DNA at the fork junction. The Mcm5 ZnF which contacts the unwound lagging strand via R184 is omitted for clarity (see Movie S2). F363 is shown to make  $\pi$ - $\pi$  interactions with the last base-pair of DNA. (C) Comparison of the Mcm7-NTH for conformations 1 and 2. Cryo-EM density is shown as mesh. (D) Comparison of the MCM loops surrounding the fork junction in CMG with the corresponding region of the inactive MCM double hexamer on dsDNA (PDB: 5BK4) (Noguchi et al., 2017). Right-hand side: the model for the active helicase is shown overlaid on the model of the inactive double hexamer having aligned globally on the MCM N-tier, for ease of comparison.

(E) Multiple sequence alignment for the Mcm7 N-terminal hairpin (strand separation pin). The internal helix and DNA-interaction residues are labelled.

(F) Comparison of previously described strand separation pins from diverse helicases (PDB: T7, 6N7W; RecBCD, 1W36; PcrA, 3PJR) (Gao et al., 2019; Singleton et al., 2004; Velankar et al., 1999). The characteristic hydrophobic residues observed to abut the last base-pair are indicated.

(G) Schematic for hypothesized lagging-strand template ssDNA exit pathways post-unwinding.

**Figure S7**

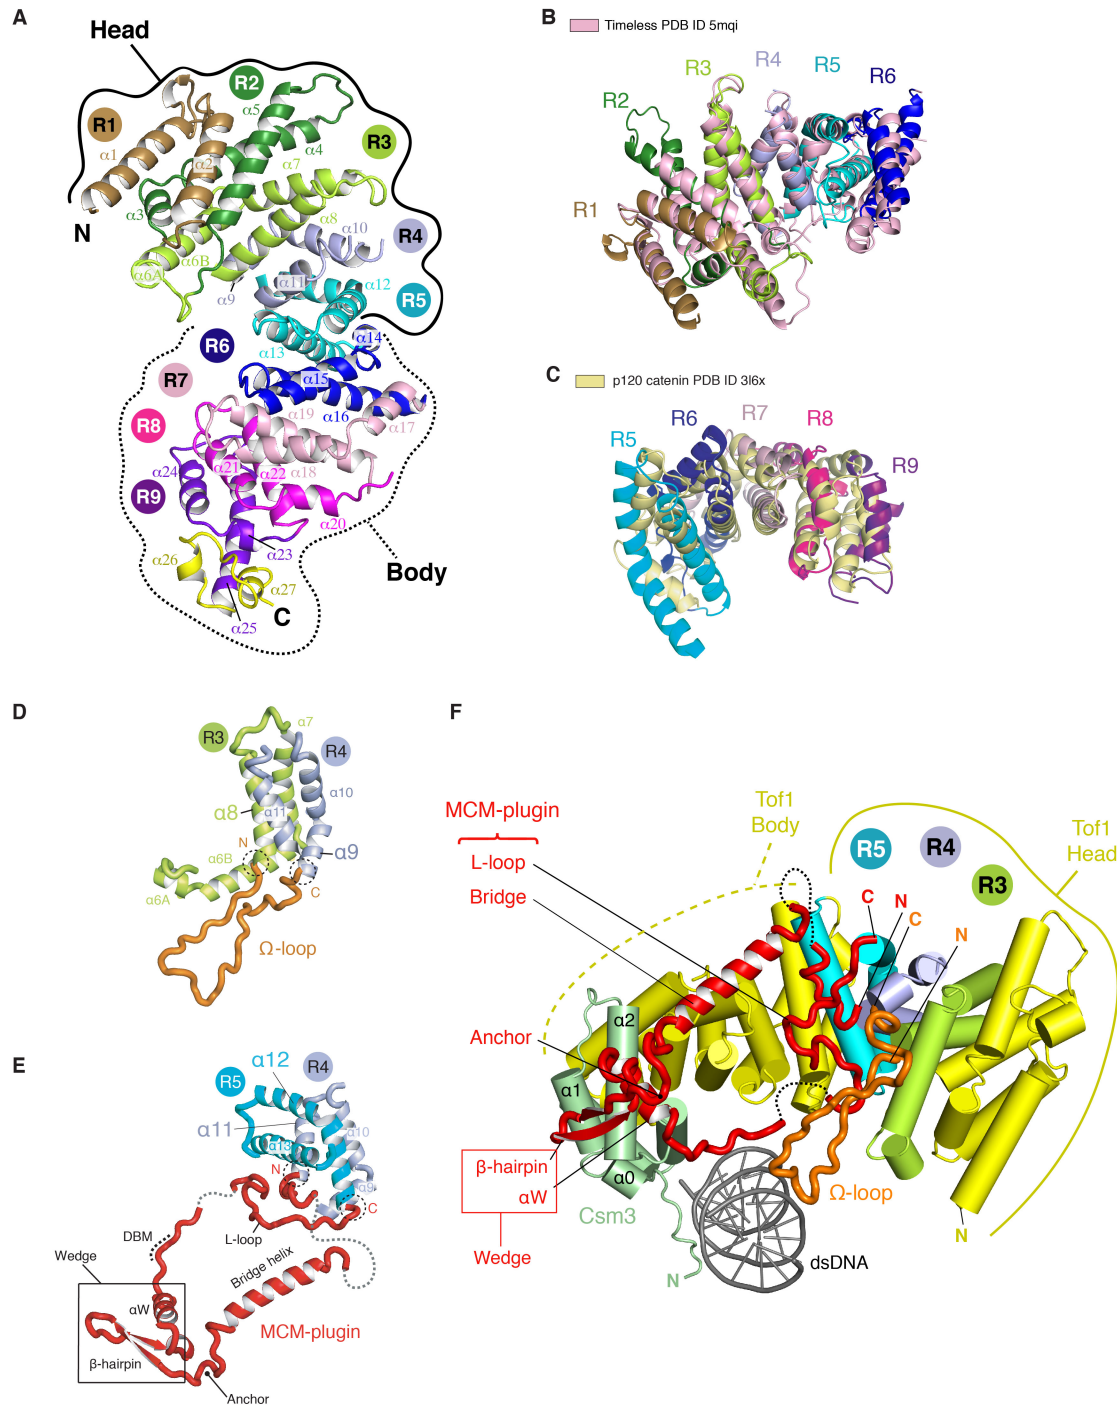

**Figure S7, related to Figure 4.**

(A) Assignment of Tof1 helical repeats. The model is coloured by helical repeat (R1-9) and the  $\alpha$ -helices are numbered. The positions of the Head (repeats 1-5) and Body (repeats 6-9) are highlighted.

(B) Superposition of Tof1 helical repeats 1-6 with the crystal structure of the human Timeless N-terminus (Holzer et al., 2017) (RMSD = 2 Å).

(C) Superposition of Tof1 helical repeats 5-9 with repeats 5-9 of p120 Catenin (Ishiyama et al., 2010) (RMSD = 6 Å). p120 Catenin was returned as the second highest scoring protein after Timeless in a Dali search (Holm and Sander, 1995) against Tof1 (13-781).

(D) Location of the Tof1  $\Omega$ -loop between helical repeats 3 and 4.

(E) Location of the MCM-plugin between helical repeats 4 and 5. The N- and C-termini of the  $\Omega$ -loop and MCM-plugin are highlighted by dashed black circles.

(F) Bottom view of Csm3/Tof1. Tof1 repeats 3, 4 and 5 are highlighted to emphasize the positions of the  $\Omega$ -loop and MCM-plugin.

Figure S8

A Tof1  $\Omega$ -loop and MCM-plugin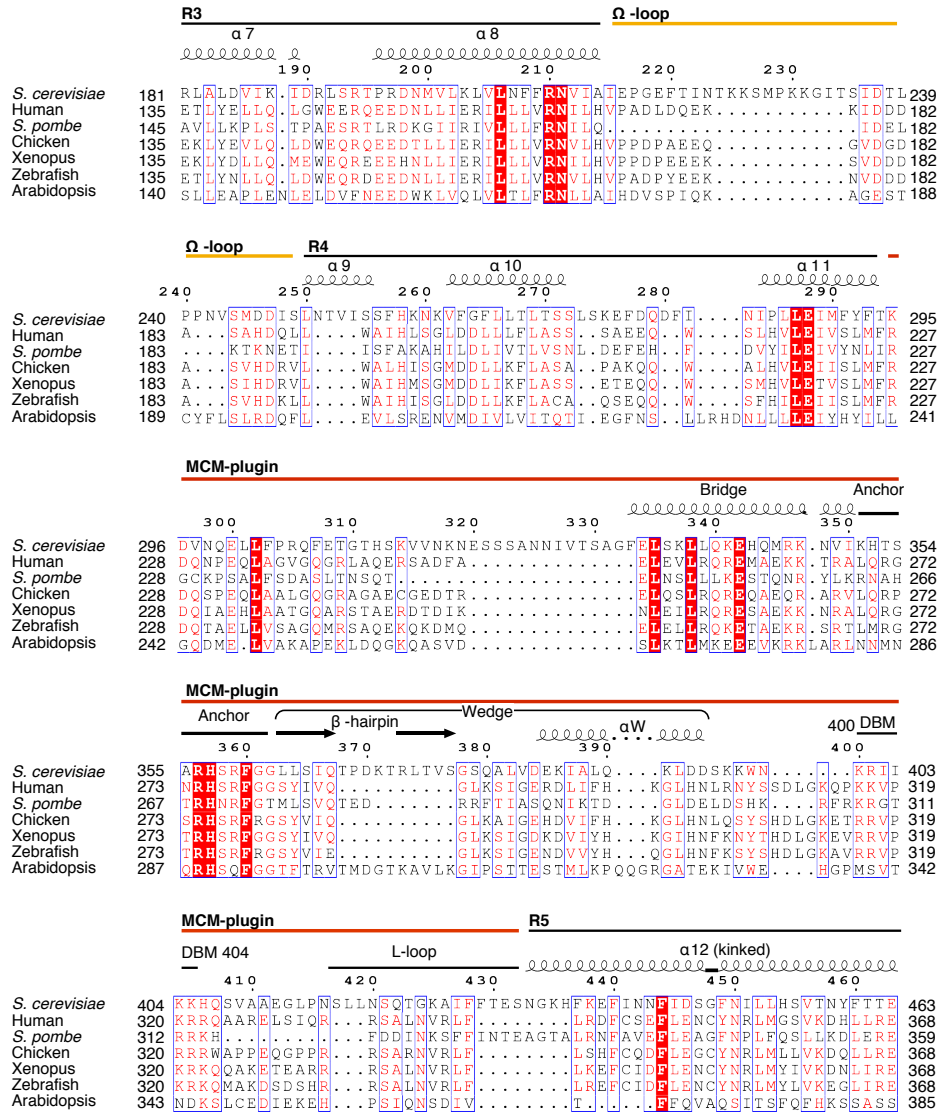

## B Csm3 (model built for 46-139)

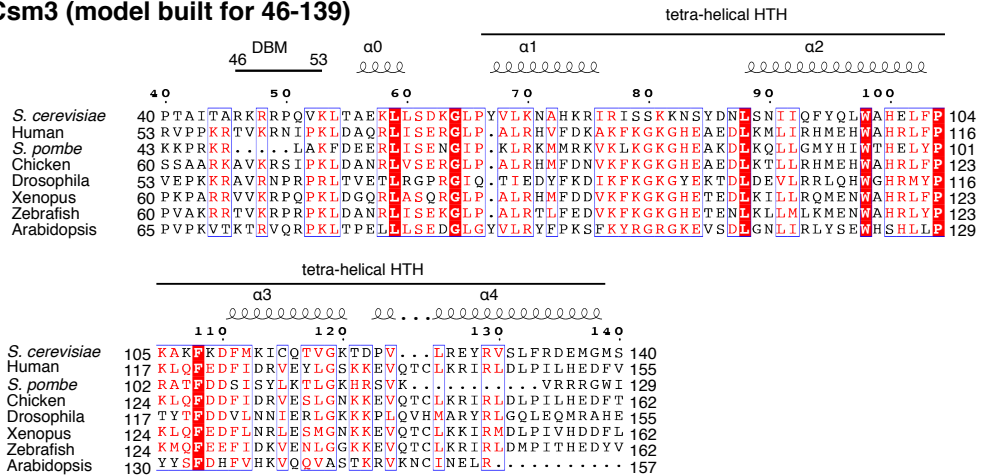

**Figure S8, related to Figure 4. Multiple sequence alignment of Csm3 and Tof1.**

(A) The sequences of Tof1 (*S. cerevisiae*, 1238 residues, SGD YNL273W) and its orthologues: human Timeless (*H. sapiens*, 1208 residues, UniProtKB Q9UNS1), Swi1 (*S. pombe*, 971 residues, UniProtKB Q9UUM2), chicken Timeless (*G. gallus*, 1217 residues, NCBI ref XP\_015155764.1), *Xenopus* Timeless (*X. tropicalis*, 1204 residues, UniProtKB F6Z6K7), zebrafish Timeless (*D. rerio*, 1278 residues, NCBI ref NP\_001265529.1) and Arabidopsis Timeless (*A. thaliana*, 1141 residues, NCBI ref NP\_200103.1).

(B) The sequence of Csm3 (*S. cerevisiae*, 317 residues, SGD YMR048W) and its orthologues: human Tipin (*H. sapiens*, 301 residues, UniProtKB Q9BVW5), Swi3 (*S. pombe*, 181 residues, UniProtKB O14350), chicken Tipin (*G. gallus*, 283 residues, UniProtKB Q5F416), *Xenopus* Tipin (*X. laevis*, 368 residues, UniProtKB Q0IHI4), zebrafish Tipin (*D. rerio*, 294 residues, UniProtKB G1K2L6) and Arabidopsis Tipin (*A. lyrata*, 287 residues, UniProtKB D7KZL5).



Figure S9

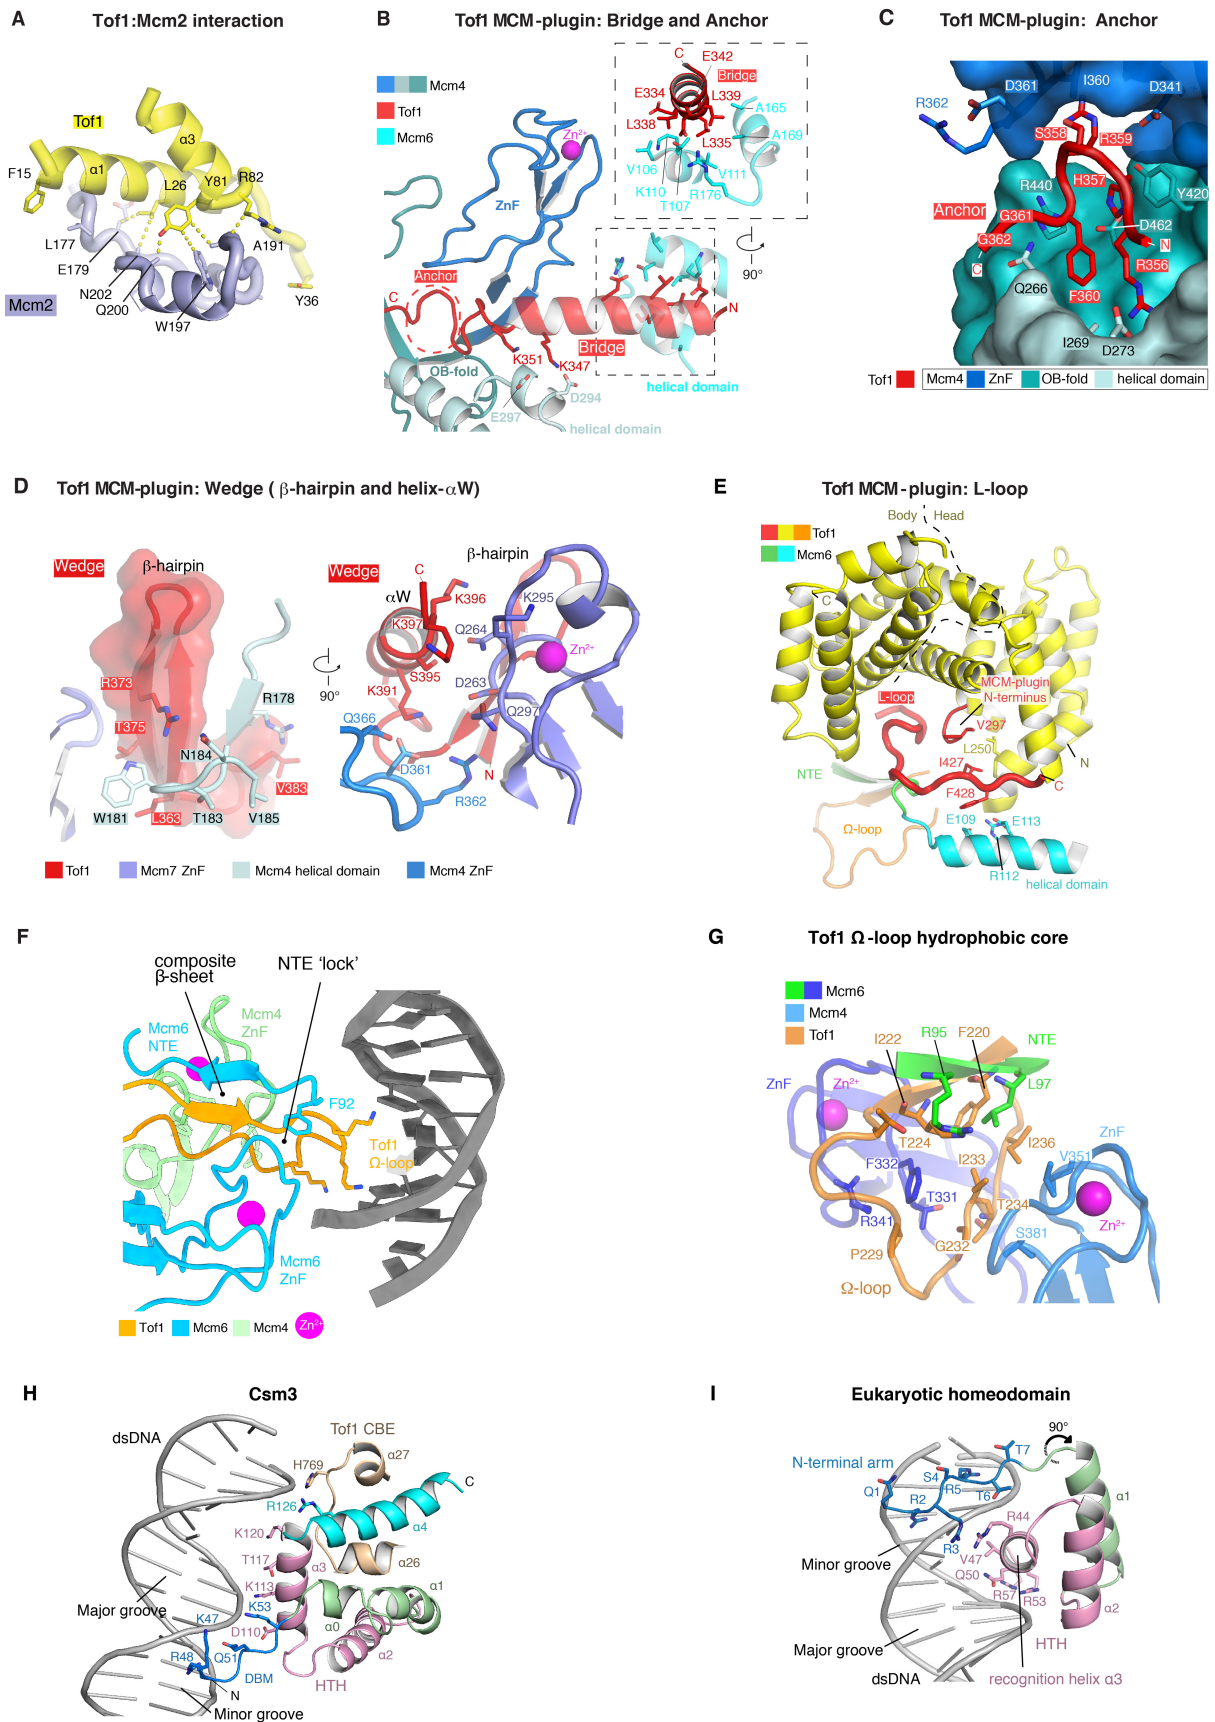

**Figure S9, related to Figure 5.**

- (A) Interface between Tof1 ( $\alpha 1$  and  $\alpha 3$ ) and the Mcm2 NTE.
  - (B) Detailed view of interactions between the Bridge and Mcm4 and 6. The position of the Anchor is highlighted with a dashed red line and the inset shows details of the Bridge interface with the Mcm6 helical domain.
  - (C) Details of Anchor binding sites on Mcm4. The Mcm4 ZnF, OB-fold and helical domain are denoted by different shades of blue.
  - (D) Details of Wedge binding to Mcm4 and 7.
  - (E) Interactions of the L-loop with the Mcm6 helical domain and NTE. The dashed black line denotes the boundary of the Tof1 Head and Body.
  - (F) Detailed view of  $\Omega$ -loop interactions with Mcm6, Mcm4 and dsDNA illustrating the 'lock' formed by the Mcm6 ZnF and NTE.
  - (G) Details of the interactions between the hydrophobic core of the  $\Omega$ -loop and Mcm6 and 4.
  - (H) Overview of the Csm3 structure. Amino acid side chains for residues in the DBM and close to dsDNA are shown.
  - (I) Binding of a typical homeodomain transcription factor to dsDNA (*Drosophila* paired protein, PDB: 1FJL) (Wilson et al., 1995) emphasizing the minor groove contacts made by the N-terminal arm.
- For (H) and (I), corresponding regions of the structures are colored similarly.  
DBM, DNA binding motif.

Figure S10

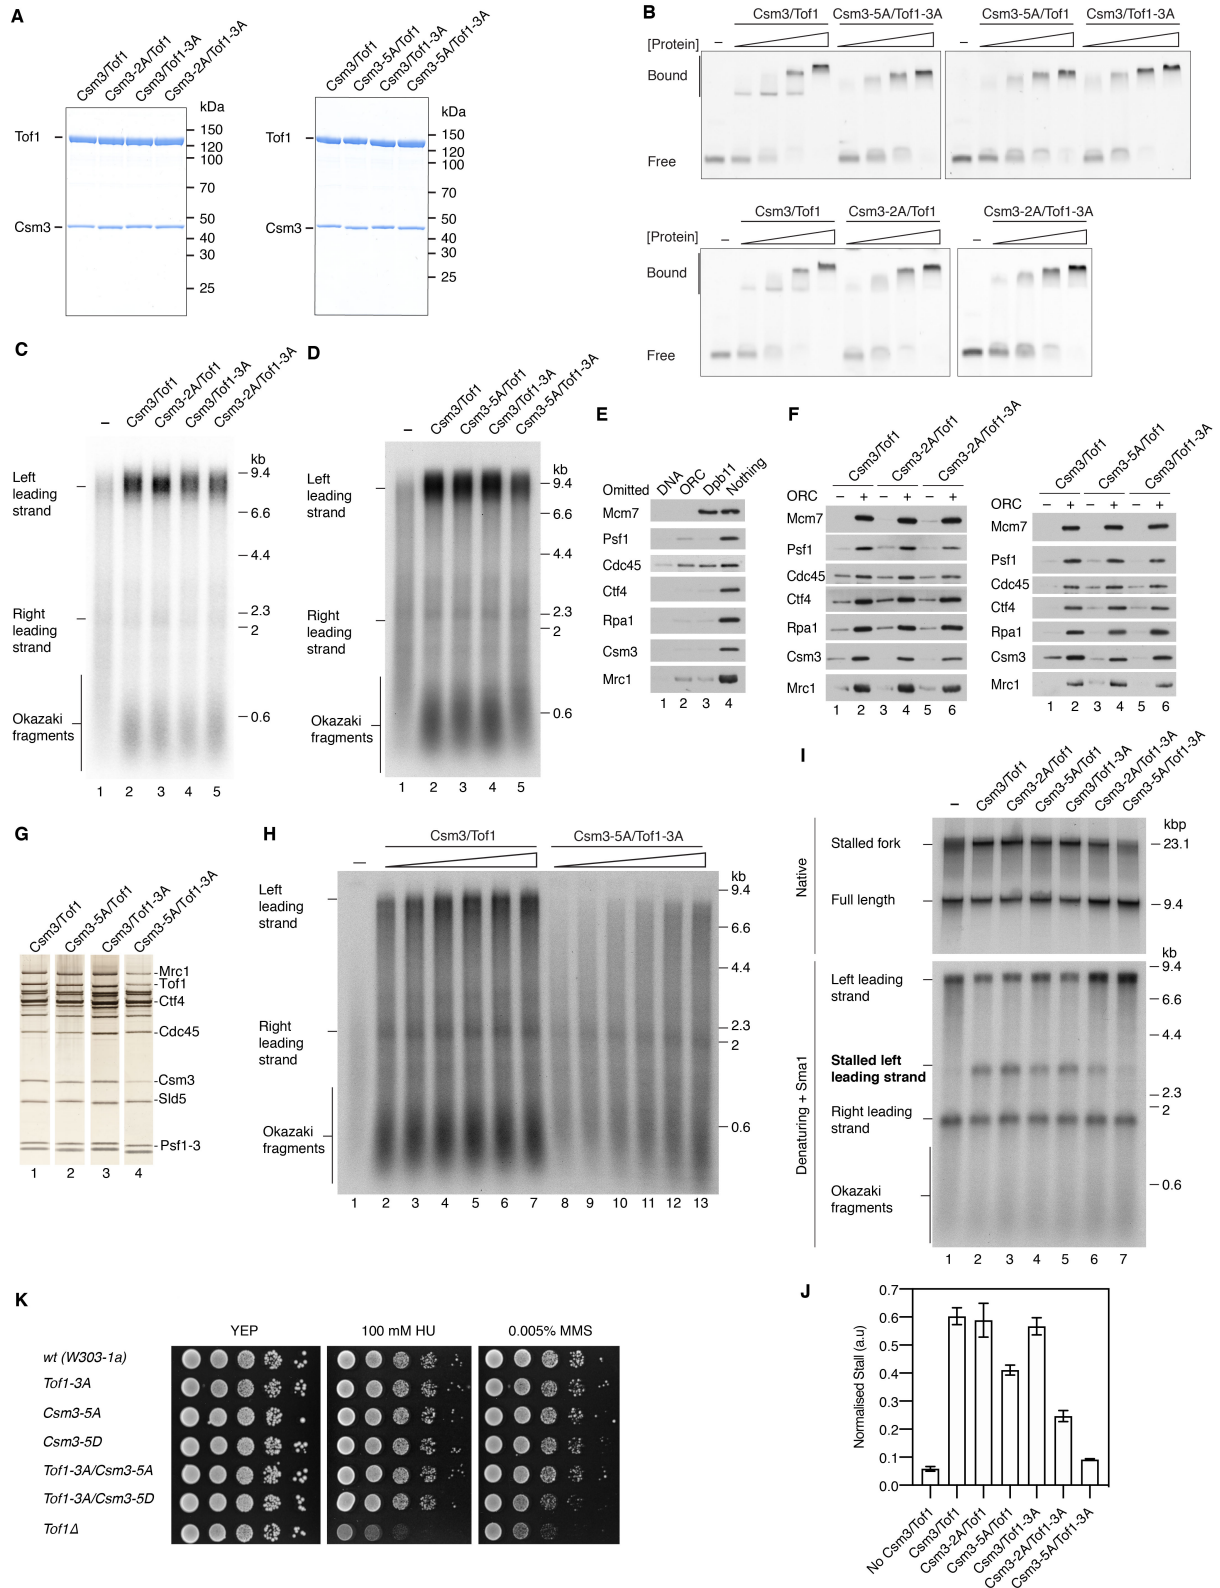**Figure S10, related to Figures 6 and 7.**

(A) Coomassie stained SDS-PAGE of Csm3/Tof1 DBM mutants.

(B) Electrophoretic mobility shift assays (EMSA) with the fork DNA substrate in Figure S1A and increasing concentrations (40, 80, 160, 320 nM) of the indicated Csm3/Tof1 proteins.

(C, D) Denaturing gel analysis of origin-dependent replication reactions performed for 15 (C) and 20 (D) min.

(E, F) Protein association assays performed as in Figure 6D.

(G) Peak fractions from native glycerol gradients performed as in Figure S1B with the indicated Csm3/Tof1 proteins.

(H) Denaturing gel analysis of an origin-dependent replication reaction performed for 7 min with increasing concentrations (2.5, 5, 10, 20, 40, 80 nM) of the indicated Csm3/Tof1 proteins.

(I) Experiment performed and analyzed as in Figure 7B but with 100 mM potassium glutamate for 30 min. Pol  $\delta$  was omitted as it catalyzes extensive strand-displacement synthesis in lower ionic strength buffers (Devbhandari et al., 2017).

(J) Quantitation of experiments performed as in (I). Error bars represent the SEM from a minimum of 3 experiments.

(K) Spot dilution assay performed for 2 days at 30°C.

SEM, standard error of the mean.

| Subunit   | Chain ID | Region                    | Residues                | Residues built                                       | Model template                             | Model building                    |
|-----------|----------|---------------------------|-------------------------|------------------------------------------------------|--------------------------------------------|-----------------------------------|
|           |          |                           |                         |                                                      |                                            |                                   |
| Csm3/Tof1 |          |                           |                         |                                                      |                                            |                                   |
| Tof1      | X        | repeats 1-6               | 1-213, 250-294, 433-550 | 13-37, 43-106, 117-213, 250-274, 280-294, 433-550    | PDB: 5MQI (Holzer <i>et al.</i> , 2017)    | Homology model docked and rebuilt |
|           |          | Ω-loop                    | 214-249                 | 214-249                                              | -                                          | <i>de novo</i>                    |
|           |          | MCM-plugin                | 295-432                 | 295-305, 329-405, 412-432                            |                                            |                                   |
|           |          | repeats 7-8               | 551-704                 | 556-606, 657-704                                     |                                            |                                   |
|           |          | CBE                       | 705-781                 | 705-781                                              |                                            |                                   |
| Csm3      | Y        | N-terminus (DBM, α0)      | 1-63                    | 46-63                                                | -                                          | <i>de novo</i>                    |
|           |          | tetrahelical-HTH (α1- α4) | 64-139                  | 64-139                                               |                                            |                                   |
|           |          |                           |                         |                                                      |                                            |                                   |
| CMG       |          |                           |                         |                                                      |                                            |                                   |
| Mcm2      | 2        | N-tier                    | 173-471                 | 173-471                                              | PDB: 5U8S (Georgescu <i>et al.</i> , 2017) | Docked and rebuilt                |
|           |          | C-tier                    | 472-868                 | 472-710, 738-868                                     |                                            |                                   |
| Mcm3      | 3        | N-tier                    | 18-336                  | 18-56, 90-332                                        |                                            | Docked and rebuilt                |
|           |          | C-tier                    | 337-740                 | 337-583, 648-689, 696-740                            |                                            |                                   |
| Mcm4      | 4        | N-tier                    | 174-505                 | 174-469                                              |                                            | Docked and rebuilt                |
|           |          | C-tier                    | 505-852                 | 505-552, 557-607, 615-731, 741-780, 792-835, 844-852 |                                            |                                   |
|           |          | WH                        | 853-933                 | 853-920, 922-927                                     |                                            | Docked and rebuilt                |
| Mcm5      | 5        | N-tier                    | 20-343                  | 20-107, 131-198, 205-213, 235-305, 320-343           |                                            | Docked and rebuilt                |
|           |          | C-tier                    | 344-694                 | 344-694                                              |                                            |                                   |
| Mcm6      | 6        | N-tier                    | 91-496                  | 91-200, 255-419, 434-463                             |                                            | Docked and rebuilt                |
|           |          | C-tier                    | 497-838                 | 497-615, 620-737, 744-838                            |                                            |                                   |
| Mcm7      | 7        | N-tier                    | 1-395                   | 4-34, 60-157, 190-210, 219-385                       |                                            | Docked and rebuilt                |
|           |          | C-tier                    | 396-730                 | 396-443, 449-486, 493-673, 679-729                   |                                            |                                   |
| Psf1      | A        | -                         | 1-208                   | 1-107, 119-208                                       |                                            | Docked and rebuilt                |
| Psf2      | B        | -                         | 1-213                   | 1-38, 47-201                                         |                                            | Docked and rebuilt                |
| Psf3      | C        | -                         | 1-194                   | 1-58, 68-144, 158-194                                |                                            | Docked and rebuilt                |

|                              |   |                    |           |                                           |                                        |                                                                 |
|------------------------------|---|--------------------|-----------|-------------------------------------------|----------------------------------------|-----------------------------------------------------------------|
|                              |   | N-terminal His-tag | (-22) - 0 | (-4) - 0                                  |                                        | <i>de novo</i>                                                  |
| Sld5                         | D | -                  | 1-294     | 2-15, 54-107, 120-294                     |                                        | Docked and rebuilt                                              |
|                              |   | CIP-box            | 2-13      | 2-13                                      |                                        | Docked and rebuilt using PDB: 4C95 (Simon <i>et al.</i> , 2014) |
| Cdc45                        | E | -                  | 1-650     | 1-108, 111-166, 223-436, 461-593, 598-650 |                                        | Docked and rebuilt                                              |
|                              |   |                    |           |                                           |                                        |                                                                 |
| Ctf4 trimer                  |   |                    |           |                                           |                                        |                                                                 |
| Ctf4 monomer (CMG interface) | F | C-terminal regions | 473-927   | 473-664, 670-791, 814-923                 | PDB: 4C8H (Simon <i>et al.</i> , 2014) | Docked and rebuilt                                              |
| Ctf4 monomer (GINS-facing)   | G |                    |           | 474-663, 670-790, 814-924                 |                                        | Docked and rebuilt                                              |
| Ctf4 monomer (Cdc45-facing)  | H |                    |           | 473-665, 670-790, 814-924                 |                                        | Docked and rebuilt                                              |
|                              |   |                    |           |                                           |                                        |                                                                 |
| Fork DNA                     |   |                    |           |                                           |                                        |                                                                 |
| Leading-strand template      | I | -                  | 1-85      | 26-62                                     | -                                      | <i>de novo</i>                                                  |
| Lagging-strand template      | J | -                  | 1-61      | 15-36                                     | -                                      | <i>de novo</i>                                                  |
|                              |   |                    |           |                                           |                                        |                                                                 |
| Ligands                      |   |                    |           |                                           |                                        |                                                                 |
| AMPPNP; Mg <sup>2+</sup>     | 2 | Mcm2/6 interface   | -         | 1500; 1501                                | -                                      | <i>de novo</i>                                                  |
|                              | 3 | Mcm3/5 interface   |           |                                           |                                        |                                                                 |
|                              | 5 | Mcm5/2 interface   |           |                                           |                                        |                                                                 |
| Zn <sup>2+</sup>             | 2 | Mcm2 ZnF           | -         | 1400                                      | -                                      | <i>de novo</i>                                                  |
|                              | 4 | Mcm4 ZnF           |           |                                           |                                        |                                                                 |
|                              | 5 | Mcm5 ZnF           |           |                                           |                                        |                                                                 |
|                              | 6 | Mcm6 ZnF           |           |                                           |                                        |                                                                 |
|                              | 7 | Mcm7 ZnF           |           |                                           |                                        |                                                                 |

**Table S1, related to STAR Methods. Summary of cryo-EM model building for conformation 1.** See Methods for further details. For CMG and Ctf4, region boundaries were approximated from the structure.



| Name   | Construction details                                                                                                                                                                                                                                                                                                                                                                                                                                                                                                     | Application                                                                        |
|--------|--------------------------------------------------------------------------------------------------------------------------------------------------------------------------------------------------------------------------------------------------------------------------------------------------------------------------------------------------------------------------------------------------------------------------------------------------------------------------------------------------------------------------|------------------------------------------------------------------------------------|
| vJY23  | pRS304-Psf1-Gal1-10-Sld5                                                                                                                                                                                                                                                                                                                                                                                                                                                                                                 | Psf1 / Sld5                                                                        |
| vJY24  | pRS306-Psf2-Gal1-10-His-Psf3                                                                                                                                                                                                                                                                                                                                                                                                                                                                                             | Psf2 / His-Psf3                                                                    |
| vJY25  | pRS303-Fob1-TEV-2xFLAG- Gal1-10-Gal4                                                                                                                                                                                                                                                                                                                                                                                                                                                                                     | Fob1                                                                               |
| vJY30  | A 243 bp fragment containing the yeast RFB from chromosome XII was amplified with JY204 – TTCACTGTTCCCTGCAGCACTTGCTCTTACATCTTTCTTGG / JY205-TTTTTTTTTTGGATCCGTTGCAAAGATGGGTTGAAAG and cloned into ZN5(Taylor and Yeeles, 2018) using BamHI and PstI. RFB sequence: GTTGCAAAGATGGGTTGAAAGAGAAGGGCTTTCACAAAGCTTCCCGAGCGTG AAAGGATTTTGCCCGGACAGTTTGCTTCATGGAGCAGTTTTTTCCGCACCATCA GAGCGGCAAACATGAGTGCTTGATAAGTTTAGAGAATTGAGAAAAGCTCATT TCCTATAGTTAACAGGACATGCCTTTGATATGAAAAAATACTACGAACTAC GATTTTACCAAGAAAGATGTAAGAGACAAGTG | RFB template                                                                       |
| vJY71  | pRS303-Cdc45 <sup>IF2</sup> -Gal1-10-Ctf4                                                                                                                                                                                                                                                                                                                                                                                                                                                                                | Cdc45 <sup>IF2</sup> / Ctf4                                                        |
| vJY72  | pRS based vector. Tof1-Gal1-10-Csm3 cloned Not1 / Apa1. Auxotrophic marker from pRS vector replaced with Nat-NT2 resistance marker amplified from pBP83 (Yeeles et al., 2015) with oligos (JY247 - TCTAGTCAATGCGGCCGCGTACGCTGCAGGTCGAC and JY248 - ATCGATGAATTCGAGCTCG) and cloned Zra1/Not1. Lys2 3321-3799 amplified with primers (JY253 – CCGATTGACAGGGCCCTTCCTCCAC TTCTACTCTTGACAC and JY254 – CCGATTGACAAAGCGGAAGAGCCGAC ATCGTAACCATAATCGTG) and cloned Sap1/Apa1.                                                  | Csm3 / Tof1                                                                        |
| vJY74  | pRS based vector. Mrc1-Gal1-10-Gal4 cloned Not1 / Apa1. Auxotrophic marker from pRS vector replaced with Nat-NT2 resistance marker amplified from pBP83 (Yeeles et al., 2015) with oligos (JY247 and JY248) and cloned Zra1 / Not1. Lys2 3321-3799 amplified with primers (JY253 and JY254) and cloned Sap1/Apa1.                                                                                                                                                                                                        | Mrc1                                                                               |
| vJY111 | pRS303-Rfa1-Gal1-10-Gal4                                                                                                                                                                                                                                                                                                                                                                                                                                                                                                 | RPA                                                                                |
| vJY113 | pRS306 Tof1-gal1-10-CBP-Csm3 <sup>R49A, K53A</sup><br>PCR mutagenesis with JY344 – AGTTGCTTTGACCGCTGAAAAGTTGTTG / 345 - TGTGGAGCTCTCTTTCTAGCGGTG                                                                                                                                                                                                                                                                                                                                                                         | Csm3 <sup>R49A, K53A</sup> /Tof1                                                   |
| vJY114 | pRS306 Tof1 <sup>K400A, R401A, K404A</sup> -gal1-10-CBP-Csm3<br>PCR mutagenesis with JY347 - ATTGCTAAGCACCAATCCGTTGCTG / JY348 - AATAGCAGCGTTCCACTTCTTAGAATCATCC from pRS306/Tof1- Gal-CBP-Csm3                                                                                                                                                                                                                                                                                                                          | Csm3/ Tof1 <sup>K400A, R401A, K404A</sup>                                          |
| vJY115 | pRS306 Tof1 <sup>K400A, R401A, K404A</sup> -gal1-10-CBP-Csm3 <sup>R49A, K53A</sup><br>Subclone Csm3 <sup>R49A, K53A</sup> into vJY114 with AscI/XhoI                                                                                                                                                                                                                                                                                                                                                                     | Csm3 <sup>R49A, K53A</sup> /Tof1 <sup>K400A, R401A, K404A</sup>                    |
| vJY116 | pRS306 Tof1-gal1-10-CBP-Csm3 <sup>K47A, R48A, R49A, Q51A, K53A</sup><br>PCR mutagenesis with JY377 - GCTCCAGCTGTTGCTTTGACCG / JY378 - AGCAGCTCTAGCGGTGATAGCAGTTG from pRS306/Tof1- Gal-CBP-Csm3                                                                                                                                                                                                                                                                                                                          | Csm3 <sup>K47A, R48A, R49A, Q51A, K53A</sup> /Tof1                                 |
| vJY117 | pRS306 Tof1 <sup>K400A, R401A, K404A</sup> -gal1-10-CBP-Csm3 <sup>K47A, R48A, R49A, Q51A, K53A</sup><br>PCR mutagenesis with JY377/JY378 from vJY114                                                                                                                                                                                                                                                                                                                                                                     | Csm3 <sup>K47A, R48A, R49A, Q51A, K53A</sup> / Tof1 <sup>K400A, R401A, K404A</sup> |
| vVA30  | The Tof1 open reading frame was amplified from W303 genomic DNA with primers VA84- TTCAATATAAGTCGACGCCCTGTATGAATTGCTTCC and vVA85 - TTCAATATAAGGCGCGCCATAGTCCTAGTAGCGGATTGC and was cloned into pFA6-Ura with AscI / Sall.                                                                                                                                                                                                                                                                                               | Parent vector for Tof1 mutagenesis                                                 |
| vVA31  | The Tof1-3A open reading frame was amplified with primers vVA84 and vVA85 and was cloned into pFA6-Ura with AscI / Sall.                                                                                                                                                                                                                                                                                                                                                                                                 | Construction of Tof1-3A strains                                                    |
| vVA32  | The Csm3 open reading frame was amplified from W303 genomic DNA with primers VA81 - TTCAATATAAGTCGACATGGATCAAGATTTTGACAGTTTATTAC and VA82 - TTCAATATAAGGCGCGCCCTAAAAGCCCATTTCCTTCATAGC and was cloned into pFA6-Ura with AscI / Sall.                                                                                                                                                                                                                                                                                    | Parent vector for Csm3 mutagenesis                                                 |
| vJY136 | PCR mutagenesis form vVA32 with JY422 – GATCCTCAAGTAGATTTAACA GCCGAAAAAC and JY423 - GTCATCATCAGCTGTAATTGCGGTTGGATC                                                                                                                                                                                                                                                                                                                                                                                                      | Construction of Csm3-5D strains                                                    |

|        |                                                                                                                            |                                    |
|--------|----------------------------------------------------------------------------------------------------------------------------|------------------------------------|
| vJY137 | PCR mutagenesis form vVA32 with JY397 – CCTGCTGTAGCATTAAACAGCCGA<br>AAAATACTCAG and JY398 - CGCTGCAGCTCTAGCTGTAATTGCGGTTGG | Construction of Csm3-5A<br>strains |
|--------|----------------------------------------------------------------------------------------------------------------------------|------------------------------------|

**Table S3, related to STAR Methods. Details of vectors used and their construction.**

| Strain | Genotype                                                                                                                                                                                                                                                                                                                                                                                                                                                                                 | Reference           |
|--------|------------------------------------------------------------------------------------------------------------------------------------------------------------------------------------------------------------------------------------------------------------------------------------------------------------------------------------------------------------------------------------------------------------------------------------------------------------------------------------------|---------------------|
| yJY36  | <i>MATa ade2-1 ura3-1 his3-11,15 trp1-1 leu2-3,112 can1-100</i><br><i>bar1::Hyg</i><br><i>pep4::KanMX</i><br><i>ura3::URA3pRS306-Psf2/His-Psf3</i> (vJY24)<br><i>trp1::TRP1pRS304Psf1/Sld5</i> (vJY23)<br><i>his::HISpRS303Cdc45iFlag2/Gal4</i>                                                                                                                                                                                                                                          | This study          |
| yAM22  | <i>MATa ade2-1 ura3-1 his3-11,15 trp1-1 leu2-3,112 can1-100</i><br><i>bar1::Hyg</i><br><i>pep4::KanMX</i><br><i>trp1::TRP1pRS304Mcm4, Mcm5</i><br><i>ura3::URA3pRS306/Mcm2, CBP-TEV Mcm3</i><br><i>leu2::LEU2pRS305/Mcm6, Mcm7</i>                                                                                                                                                                                                                                                       | (Zhou et al., 2017) |
| yJY37  | <i>MATa / MATa ade2-1 ura3-1 his3-11,15 trp1-1 leu2-3,112 can1-100</i><br><i>bar1::Hyg</i><br><i>pep4::KanMX</i><br><i>trp1::TRP1pRS304Mcm4, Mcm5</i><br><i>trp1::TRP1pRS304Psf1/Sld5</i> (vJY23)<br><i>ura3::URA3pRS306/Mcm2, CBP-TEV Mcm3</i><br><i>ura3::URA3pRS306-Psf2/His-Psf3</i> (vJY24)<br><i>leu2::LEU2pRS305/Mcm6, Mcm7</i><br><i>his::HISpRS303Cdc45iFlag2/Gal4</i>                                                                                                          | This study          |
| yJY39  | <i>MATa ade2-1 ura3-1 his3-11,15 trp1-1 leu2-3,112 can1-100</i><br><i>bar1::Hyg</i><br><i>pep4::KanMX</i><br><i>his3::HISpRS303-Fob1-TEV-2xFLAG- Gal1-10-Gal4</i> (vJY25)                                                                                                                                                                                                                                                                                                                | This study          |
| yJY72  | <i>MATa ade2-1 ura3-1 his3-11,15 trp1-1 leu2-3,112 can1-100</i><br><i>bar1::Hyg</i><br><i>pep4::KanMX</i><br><i>ura3::URA3pRS306-Psf2/His-Psf3</i> (vJY23)<br><i>trp1::TRP1pRS304Psf1/Sld5</i> (vJY24)<br><i>his::HISpRS303Cdc45iFlag2/untagged Ctf4</i> (vJY71)<br><i>lys2::NAT-untagged Mrc1</i> (vJY74)                                                                                                                                                                               | This study          |
| yJY69  | <i>MATa ade2-1 ura3-1 his3-11,15 trp1-1 leu2-3,112 can1-100</i><br><i>bar1::Hyg</i><br><i>pep4::KanMX</i><br><i>trp1::TRP1pRS304Mcm4, Mcm5</i><br><i>ura3::URA3pRS306/Mcm2, CBP-TEV Mcm3</i><br><i>leu2::LEU2pRS305/Mcm6, Mcm7</i><br><i>lys2::NAT-untagged Csm3/Tof1</i> (vJY72)                                                                                                                                                                                                        | This study          |
| yJY74  | <i>MATa /MATa ade2-1 ura3-1 his3-11,15 trp1-1 leu2-3,112 can1-100</i><br><i>bar1::Hyg</i><br><i>pep4::KanMX</i><br><i>trp1::TRP1pRS304Mcm4, Mcm5</i><br><i>trp1::TRP1pRS304Psf1/Sld5</i> (vJY23)<br><i>ura3::URA3pRS306/Mcm2, CBP-TEV Mcm3</i><br><i>ura3::URA3pRS306-Psf2/His-Psf3</i> (vJY24)<br><i>leu2::LEU2pRS305/Mcm6, Mcm7</i><br><i>his::HISpRS303Cdc45iFlag2/untagged Ctf4</i> (vJY71)<br><i>lys2::NAT-untagged Csm3/Tof1</i> (vJY72)<br><i>lys2::NAT-untagged Mrc1</i> (vJY74) | This study          |
| yJY106 | <i>MATa ade2-1 ura3-1 his3-11,15 trp1-1 leu2-3,112 can1-100</i><br><i>bar1::Hyg</i><br><i>pep4::KanMX</i><br><i>ura3::URA3pRS306/Rfa2,Rfa3</i><br><i>his::HISpRS303Untagged RPA1</i> (vJY111)                                                                                                                                                                                                                                                                                            | This study          |
| yJY110 | <i>MATa ade2-1 ura3-1 his3-11,15 trp1-1 leu2-3,112 can1-100</i><br><i>bar1::Hyg</i><br><i>pep4::KanMX</i><br><i>URA::Ura pRS306 Tof1-gal1-10-CBP-Csm3<sup>R49A</sup> / K53A</i> (vJY113)                                                                                                                                                                                                                                                                                                 | This study          |
| yJY111 | <i>MATa ade2-1 ura3-1 his3-11,15 trp1-1 leu2-3,112 can1-100</i><br><i>bar1::Hyg</i>                                                                                                                                                                                                                                                                                                                                                                                                      | This study          |

|         |                                                                                                                                                                                                                                         |                                        |
|---------|-----------------------------------------------------------------------------------------------------------------------------------------------------------------------------------------------------------------------------------------|----------------------------------------|
|         | <i>pep4::KanMX</i><br><i>URA::Ura pRS306 Tof1<sup>K400, R401A, K404A</sup>-gal1-10-CBP-Csm3</i> (vJY114)                                                                                                                                |                                        |
| yJY112  | <i>MATa ade2-1 ura3-1 his3-11,15 trp1-1 leu2-3,112 can1-100</i><br><i>bar1::Hyg</i><br><i>pep4::KanMX</i><br><i>URA::Ura pRS306 Tof1<sup>K400A, R401A, K404A</sup>-gal1-10-CBP-Csm3<sup>R49A, K53A</sup></i> (vJY115)                   | This study                             |
| yJY120  | <i>MATa ade2-1 ura3-1 his3-11,15 trp1-1 leu2-3,112 can1-100</i><br><i>bar1::Hyg</i><br><i>pep4::KanMX</i><br><i>URA::Ura pRS306 Tof1-gal1-10-CBP-Csm3<sup>K47A, R48A, R49A, Q51A, K53A</sup></i> (vJY116)                               | This study                             |
| yJY121  | <i>MATa ade2-1 ura3-1 his3-11,15 trp1-1 leu2-3,112 can1-100</i><br><i>bar1::Hyg</i><br><i>pep4::KanMX</i><br><i>URA::Ura pRS306 Tof1<sup>K400A, R401A, K404A</sup>-gal1-10-CBP-Csm3<sup>K47A, R48A, R49A, Q51A, K53A</sup></i> (vJY117) | This study                             |
| W303-1a | <i>MATa ade2-1 ura3-1 his3-11,15 trp1-1 leu2-3,112 can1-100</i>                                                                                                                                                                         | Lab strain constructed by R. Rothstein |
| yJY145  | <i>MATa ade2-1 ura3-1 his3-11,15 trp1-1 leu2-3,112 can1-100</i><br><i>Csm3</i> ( <i>Ura3</i> )                                                                                                                                          | This study                             |
| yVA57   | <i>MATa ade2-1 ura3-1 his3-11,15 trp1-1 leu2-3,112 can1-100</i><br><i>Tof1-3A</i> ( <i>K400A, R401A, K404A</i> )                                                                                                                        | This study                             |
| yVA67   | <i>MATa ade2-1 ura3-1 his3-11,15 trp1-1 leu2-3,112 can1-100</i><br><i>Csm3-5D</i> ( <i>R46D, K47D, R48D, R49D, K53D</i> ) ( <i>Ura3</i> )                                                                                               | This study                             |
| yVA68   | <i>MATa ade2-1 ura3-1 his3-11,15 trp1-1 leu2-3,112 can1-100</i><br><i>Csm3-5A</i> ( <i>K47A / R48A / R49A / Q51A / K53A</i> ) ( <i>Ura3</i> )                                                                                           | This study                             |
| yVA70   | <i>MATa ade2-1 ura3-1 his3-11,15 trp1-1 leu2-3,112 can1-100</i><br><i>Tof1-3A</i><br><i>Csm3-5D</i> ( <i>R46D, K47D, R48D, R49D, K53D</i> ) ( <i>Ura3</i> )                                                                             | This study                             |
| yVA73   | <i>MATa ade2-1 ura3-1 his3-11,15 trp1-1 leu2-3,112 can1-100</i><br><i>Tof1-3A</i><br><i>Csm3-5A</i> ( <i>K47A, R48A, R49A, Q51A, K53A</i> ) ( <i>Ura3</i> )                                                                             | This study                             |
| yBH77   | <i>MATa ade2-1 ura3-1 his3-11,15 trp1-1 leu2-3,112 can1-100</i><br><i>tof1Δ::hphNT</i>                                                                                                                                                  | (Hodgson et al., 2007)                 |

**Table S4, related to STAR Methods. Details of yeast strains.**

| Protein        | Expression strain                           | Affinity tag                         | Purification steps                                                                                                                                                               |
|----------------|---------------------------------------------|--------------------------------------|----------------------------------------------------------------------------------------------------------------------------------------------------------------------------------|
| Cdc45          | yJY13                                       | Internal 2xFLAG tag                  | Anti-FLAG M2 Agarose<br>Bio-Gel HT Hydroxyapatite                                                                                                                                |
| Cdc6           | Plasmid pAM3 ( <i>E. coli</i> expression)   | N-terminal GST cleavable tag         | Glutathione Sepharose 4B<br>Bio-Gel HT Hydroxyapatite                                                                                                                            |
| Cdt1-Mcm2-7    | yAM33                                       | N-terminal CBP cleavable tag on Mcm3 | Calmodulin-Sepharose 4B<br>Superdex 200                                                                                                                                          |
| Csm3/Tof1      | yAE48                                       | N-terminal CBP cleavable tag on Csm3 | Calmodulin-Sepharose 4B<br>MonoQ<br>Superdex 200                                                                                                                                 |
| Ctf4           | yAE40                                       | N-terminal CBP tag                   | Calmodulin-Sepharose 4B<br>MonoQ<br>Superdex 200                                                                                                                                 |
| DDK            | ySDK8                                       | CBP tag on Dbf4                      | Calmodulin-Sepharose 4B<br>Lambda phosphatase dephosphorylation<br>Superdex 200                                                                                                  |
| Dpb11          | yJY26                                       | C-terminal 3xFLAG tag                | Anti-FLAG M2 Agarose<br>MonoS                                                                                                                                                    |
| GIN5           | Plasmid pJFDJ5 ( <i>E. coli</i> expression) | N-terminal His tag on Psf3           | Ni-NTA Agarose<br>MonoQ<br>Superdex 200                                                                                                                                          |
| Mcm10          | pET28a-Mcm10 ( <i>E. coli</i> expression)   | N-terminal His tag                   | Ni-NTA Agarose<br>MonoS (twice)                                                                                                                                                  |
| Mrc1           | yJY32                                       | C-terminal 2xFLAG tag                | Anti-FLAG M2 Agarose<br>Superose 6                                                                                                                                               |
| ORC            | ySD-ORC                                     | CBP-cleavable tag on Orc1            | Calmodulin-Sepharose 4B<br>Superdex 200                                                                                                                                          |
| PCNA           | vJY19 ( <i>E. coli</i> expression)          | Untagged                             | Nucleic acid precipitation with Polymin P<br>Ammonium sulfate precipitation<br>HiTrap SP HP (flow through)<br>HiTrap Heparin HP (flow through)<br>HiTrap DEAE Fast Flow<br>MonoQ |
| Pol $\alpha$   | yAE95                                       | N-terminal CBP tag on Pri1           | Calmodulin-Sepharose 4B<br>MonoQ<br>Superdex 200                                                                                                                                 |
| Pol $\delta$   | yAE34                                       | C-terminal CBP tag on Pol32          | Calmodulin-Sepharose 4B<br>HiTrap Heparin HP<br>Superdex 200                                                                                                                     |
| Pol $\epsilon$ | yAJ2                                        | C-terminal CBP tag on Dpb4           | Calmodulin-Sepharose 4B<br>HiTrap Heparin HP<br>Superdex 200                                                                                                                     |
| RFC            | yAE41                                       | N-terminal CBP tag on Rfc3           | Calmodulin-Sepharose 4B<br>MonoS<br>Superdex 200                                                                                                                                 |
| RPA            | yJY106                                      | Untagged                             | Nucleic acid precipitation with Polymin P<br>Ammonium sulfate precipitation<br>HiTrap Blue HP<br>ssDNA Cellulose<br>MonoQ                                                        |

|                                 |       |                                                                                                       |                                                                            |
|---------------------------------|-------|-------------------------------------------------------------------------------------------------------|----------------------------------------------------------------------------|
| Sld2                            | yTD8  | C-terminal 3x FLAG                                                                                    | Ammonium sulfate precipitation<br>Anti-FLAG M2 Agarose<br>HiTrap SP HP     |
| Sld3/7                          | yTD6  | C-terminal cleavable TCP tag                                                                          | IgG Sepharose Fast Flow<br>TEV removal with Ni-NTA Agarose<br>Superdex 200 |
| CMG                             | yJY37 | Internal 2xFLAG tag on Cdc45<br>N-terminal CBP cleavable tag on<br>Mcm3<br>N-terminal His tag on Psf3 | Anti-FLAG M2 Agarose<br>Calmodulin-Sepharose 4B<br>MonoQ                   |
| Fob1                            | yJY39 | C-terminal TEV 2x FLAG                                                                                | Anti-FLAG M2 Agarose<br>MonoQ                                              |
| CMG-Ctf4-<br>Csm3/Tof1-<br>Mrc1 | yJY74 | Internal 2xFLAG tag on Cdc45<br>N-terminal CBP cleavable tag on<br>Mcm3<br>N-terminal His tag on Psf3 | Anti-FLAG M2 Agarose<br>Calmodulin-Sepharose 4B<br>Glycerol gradient       |

**Table S5, related to STAR Methods. Details of protein purification strategy.**
